# Supplementary material for: Pharmacologic Activation of p53 Triggers Viral Mimicry Response Thereby Abolishing Tumor Immune Evasion and Promoting Antitumor Immunity
Source: Oxford University Press journal article supplement (doi:10.1158/2159-8290.cd-20-1741), 2021-07-06
Supplement: cd-20-1741_supplementary_references_suppsr1.docx [file cd-20-1741_supplementary_references_suppsr1.docx]

**Pharmacological activation of p53 triggers viral mimicry response thereby abolishing tumor immune evasion and promoting anti-tumor immunity**

Xiaolei Zhou1, 4, Madhurendra Singh1, 4, Gema Sanz Santos1, Vincent Guerlavais2, Luis A. Carvajal2, Manuel Aivado2, Yue Zhan1, Mariana M.S. Oliveira1, Lisa S. Westerberg1, D. Allen Annis2, John Inge Johnsen3 and Galina Selivanova1, 5

1Department of Microbiology, Tumor and Cell Biology, Karolinska Institutet, Stockholm, 171 65, Sweden

2Aileron Therapeutics, Inc. 490 Arsenal Way, Suite 210, Watertown, MA 02472, USA

3Department of Women's and Children's Health, Childhood Cancer Research Unit, Karolinska Institutet, Stockholm, 171 77 Sweden

4These authors contributed equally

5Lead author: Galina Selivanova, galina.selivanova@ki.se; Department of Microbiology, Tumor and Cell Biology, Biomedicum C8, Karolinska Institutet, 171 65 Stockholm; Sweden; Tel: +46 8 52486302.

Running title: p53 activation of ERVs boosts anti-cancer immune response

Key words: p53, MDM2 inhibitors, endogenous retroviruses, interferon, immunotherapy

Financing: This study was supported by the Swedish Cancer Society (G.S) (20 1127 PjF 01 H), the Swedish Research Council (G.S) (2019-01725), and the Karolinska Institutet Research foundation (G.S).

Conflict of Interest: V.G., L.A.C., M.A. and D.A.A. are employees of Aileron Therapeutics, Inc. All other authors declare no competing interests.

**REFERENCES**

1. Andrysik Z, Galbraith MD, Guarnieri AL, Zaccara S, Sullivan KD, Pandey A, et al. Identification of a core TP53 transcriptional program with highly distributed tumor suppressive activity. Genome Res. 2017;27:1645-57.

2. Peuget S, Zhu J, Sanz G, Singh M, Gaetani M, Chen X, et al. Thermal Proteome Profiling Identifies Oxidative-Dependent Inhibition of the Transcription of Major Oncogenes as a New Therapeutic Mechanism for Select Anticancer Compounds. Cancer research. 2020;80:1538-50.

3. Goel S, DeCristo MJ, Watt AC, BrinJones H, Sceneay J, Li BB, et al. CDK4/6 inhibition triggers anti-tumour immunity. Nature. 2017;548:471-5.

4. Sheng W, LaFleur MW, Nguyen TH, Chen S, Chakravarthy A, Conway JR, et al. LSD1 Ablation Stimulates Anti-tumor Immunity and Enables Checkpoint Blockade. Cell. 2018;174:549-63 e19.

5. Diebold SS, Cotten M, Koch N, Zenke M. MHC class II presentation of endogenously expressed antigens by transfected dendritic cells. Gene Ther. 2001;8:487-93.

6. Zetsche B, Heidenreich M, Mohanraju P, Fedorova I, Kneppers J, DeGennaro EM, et al. Multiplex gene editing by CRISPR-Cpf1 using a single crRNA array. Nat Biotechnol. 2017;35:31-4.

7. Li H, Rauch T, Chen ZX, Szabo PE, Riggs AD, Pfeifer GP. The histone methyltransferase SETDB1 and the DNA methyltransferase DNMT3A interact directly and localize to promoters silenced in cancer cells. J Biol Chem. 2006;281:19489-500.

8. Nowicka M, Krieg C, Crowell HL, Weber LM, Hartmann FJ, Guglietta S, et al. CyTOF workflow: differential discovery in high-throughput high-dimensional cytometry datasets. F1000Res. 2017;6:748.

9. Kotecha N, Krutzik PO, Irish JM. Web-based analysis and publication of flow cytometry experiments. Curr Protoc Cytom. 2010;Chapter 10:Unit10 7.

10. Ellis B HP, Hahne F, Le Meur N, Gopalakrishnan N, Spidlen J, Jiang M, Finak G flowCore: Basic structures for flow cytometry data. R package version 1.52.1. 2019.

11. Van Gassen S, Callebaut B, Van Helden MJ, Lambrecht BN, Demeester P, Dhaene T, et al. FlowSOM: Using self-organizing maps for visualization and interpretation of cytometry data. Cytometry A. 2015;87:636-45.

12. Wilkerson MD, Hayes DN. ConsensusClusterPlus: a class discovery tool with confidence assessments and item tracking. Bioinformatics. 2010;26:1572-3.

13. H W. ggplot2: Elegant Graphics for Data Analysis: Springer-Verlag New York; 2016.

14. Cerami E, Gao J, Dogrusoz U, Gross BE, Sumer SO, Aksoy BA, et al. The cBio cancer genomics portal: an open platform for exploring multidimensional cancer genomics data. Cancer Discov. 2012;2:401-4.

15. Gao J, Aksoy BA, Dogrusoz U, Dresdner G, Gross B, Sumer SO, et al. Integrative analysis of complex cancer genomics and clinical profiles using the cBioPortal. Sci Signal. 2013;6:pl1.

16. Love MI, Huber W, Anders S. Moderated estimation of fold change and dispersion for RNA-seq data with DESeq2. Genome Biol. 2014;15:550.

17. Jin Y, Tam OH, Paniagua E, Hammell M. TEtranscripts: a package for including transposable elements in differential expression analysis of RNA-seq datasets. Bioinformatics. 2015;31:3593-9.

18. Langmead B, Salzberg SL. Fast gapped-read alignment with Bowtie 2. Nat Methods. 2012;9:357-9.

19. Bulut-Karslioglu A, De La Rosa-Velazquez IA, Ramirez F, Barenboim M, Onishi-Seebacher M, Arand J, et al. Suv39h-dependent H3K9me3 marks intact retrotransposons and silences LINE elements in mouse embryonic stem cells. Mol Cell. 2014;55:277-90.

20. Zhang Y, Liu T, Meyer CA, Eeckhoute J, Johnson DS, Bernstein BE, et al. Model-based analysis of ChIP-Seq (MACS). Genome Biol. 2008;9:R137.

21. Ramirez F, Ryan DP, Gruning B, Bhardwaj V, Kilpert F, Richter AS, et al. deepTools2: a next generation web server for deep-sequencing data analysis. Nucleic Acids Res. 2016;44:W160-5.

22. Subramanian A, Tamayo P, Mootha VK, Mukherjee S, Ebert BL, Gillette MA, et al. Gene set enrichment analysis: a knowledge-based approach for interpreting genome-wide expression profiles. Proc Natl Acad Sci U S A. 2005;102:15545-50.

23. Liberzon A, Subramanian A, Pinchback R, Thorvaldsdottir H, Tamayo P, Mesirov JP. Molecular signatures database (MSigDB) 3.0. Bioinformatics. 2011;27:1739-40.

24. Zhang F, Zakaria SM, Hogqvist Tabor V, Singh M, Tronnersjo S, Goodwin J, et al. MYC and RAS are unable to cooperate in overcoming cellular senescence and apoptosis in normal human fibroblasts. Cell cycle. 2018;17:2697-715.

25. Javanmoghadam-Kamrani S, Keyomarsi K. Synchronization of the cell cycle using lovastatin. Cell Cycle. 2008;7:2434-40.

26. Chiappinelli KB, Strissel PL, Desrichard A, Li H, Henke C, Akman B, et al. Inhibiting DNA Methylation Causes an Interferon Response in Cancer via dsRNA Including Endogenous Retroviruses. Cell. 2015;162:974-86.
