# Supplementary material for: Pharmacologic Activation of p53 Triggers Viral Mimicry Response Thereby Abolishing Tumor Immune Evasion and Promoting Antitumor Immunity
Source: Oxford University Press journal article supplement (doi:10.1158/2159-8290.cd-20-1741), 2021-07-06
Supplement: cd-20-1741_supplementary_table_s2_suppst2.xls [file cd-20-1741_supplementary_table_s2_suppst2.xls]

## Sheet: sheet1
	Viable	CD45	CD3	CD4	Monocytes	Treg	CD8	M1	M2	gMDSC	mMDSC	NK
FMO 1 CD3_F1_F01_041.fcs	341739	182134	20163	24	120907	3	184	20442	19041	34367	14922	4230
FMO 2 CD25_F3_F03_043.fcs	253568	110861	18681	2333	58647	0	1156	6743	18151	15535	7509	4510
FMO 3 FoxP3_F5_F05_045.fcs	282470	131374	20656	1010	79015	0	1132	8435	17308	21477	17006	4652
FMO 4 Ly-6C_F7_F07_047.fcs	294611	137196	20277	1320	84695	732	2952	11701	19004	23996	12796	5298
FMO 5 F4,2f,80_F9_F09_049.fcs	204544	91235	16056	873	51235	418	1789	18	36	21141	3730	3196
FMO 6 CD206_F11_F11_051.fcs	205657	87068	12000	546	52939	278	841	14459	612	23163	3766	4057
FMO 7 CD49b_G1_G01_053.fcs	194320	80385	11217	660	47533	347	1238	3419	9626	19492	3683	109
Vehicle
Grp 1_A1_A01_001.fcs	222257	96981	21689	1610	53337	1084	907	5265	11524	16201	10203	2509
Grp 1_A2_A02_002.fcs	255583	112031	13241	1845	67681	797	677	8885	23695	15043	10533	4090
Grp 1_A3_A03_003.fcs	304898	143503	23424	2192	76631	668	797	8897	22500	22648	8057	5197
Grp 1_A4_A04_004.fcs	230279	115235	8597	792	75523	371	361	5987	12699	30834	10420	3883
Grp 1_A5_A05_005.fcs	185678	77892	6262	426	49202	165	314	2185	12610	24581	1206	3177
Grp 1_A6_A06_006.fcs	298316	167557	27299	1873	102164	915	1601	14618	35130	21159	17209	5497
ALRN-6924
Grp 2_B1_B01_008.fcs	226861	123458	18904	688	74126	433	1285	10343	8290	30190	9154	2694
Grp 2_B2_B02_009.fcs	245677	121729	19255	699	75573	322	622	6782	13328	32432	8971	4869
Grp 2_B3_B03_010.fcs	274356	132617	18699	892	82030	463	873	8988	17294	25791	16613	4501
Grp 2_B4_B04_011.fcs	251692	143137	28528	1950	79160	1182	1919	5098	10987	29905	21714	3325
Grp 2_B5_B05_012.fcs	192970	108430	14613	469	67686	219	614	5538	8959	27516	10298	2663
Grp 2_B6_B06_013.fcs	204043	103699	16924	714	59399	334	707	4714	7687	24404	10164	3053
Vehicle
CD45+	CD3+	CD4+	Tregs	CD8+	M1	M2	gMDSC	mMDSC	NK	Treg/CD8	CD8+/Treg	M1/M2	CD4+/CD8+
436346	2236.42	742.312	499.793	418.184	987.12	2160.6	3037.48	1912.93	470.405	1.19515	0.836716	0.456873	0.563354
438335	1181.91	1393.4	601.918	511.291	1312.78	3500.98	2222.63	1556.27	604.305	1.17725	0.849435	0.374974	0.366938
470659	1632.3	935.792	285.178	340.249	1161.02	2936.15	2955.46	1051.4	678.185	0.838143	1.19311	0.395422	0.363595
500415	746.041	921.252	431.546	419.914	792.739	1681.47	4082.73	1379.71	514.148	1.0277	0.973046	0.471454	0.455808
419500	803.934	680.294	263.494	501.437	444.088	2562.9	4995.94	245.112	645.705	0.525478	1.90303	0.173275	0.737089
561676	1629.24	686.106	335.177	586.468	1430.84	3438.59	2071.08	1684.45	538.056	0.571518	1.74973	0.416112	0.854778
ALRN-6924
544201	1531.21	363.944	229.052	679.75	1395.33	1118.37	4072.79	1234.92	363.435	0.336965	2.96767	1.24765	1.86773
495484	1581.79	363.023	167.229	323.033	897.41	1763.59	4291.48	1187.06	644.278	0.517685	1.93168	0.508854	0.889843
483376	1410	477.031	247.607	466.87	1095.7	2108.25	3144.09	2025.23	548.702	0.530355	1.88553	0.519718	0.9787
568699	1993.06	683.539	414.33	672.672	644.012	1387.95	3777.79	2743.05	420.035	0.615946	1.62352	0.464003	0.984103
561901	1347.69	320.947	149.867	420.174	818.19	1323.61	4065.24	1521.44	393.434	0.356678	2.80365	0.618149	1.30917
508221	1632.03	421.886	197.353	417.75	793.616	1294.13	4108.49	1711.14	513.982	0.472419	2.11677	0.613243	0.990196
